# Supplementary material for: HIVEP3 cooperates with ferroptosis gene signatures to confer adverse prognosis in acute myeloid leukemia
Source: PubMed Central journal article supplement (PMC9761064; doi:10.1002/cam4.4806), 2022-05-10

Figure S1.

## Univariate cox regression in the TCGA-LAML cohort (n=151)

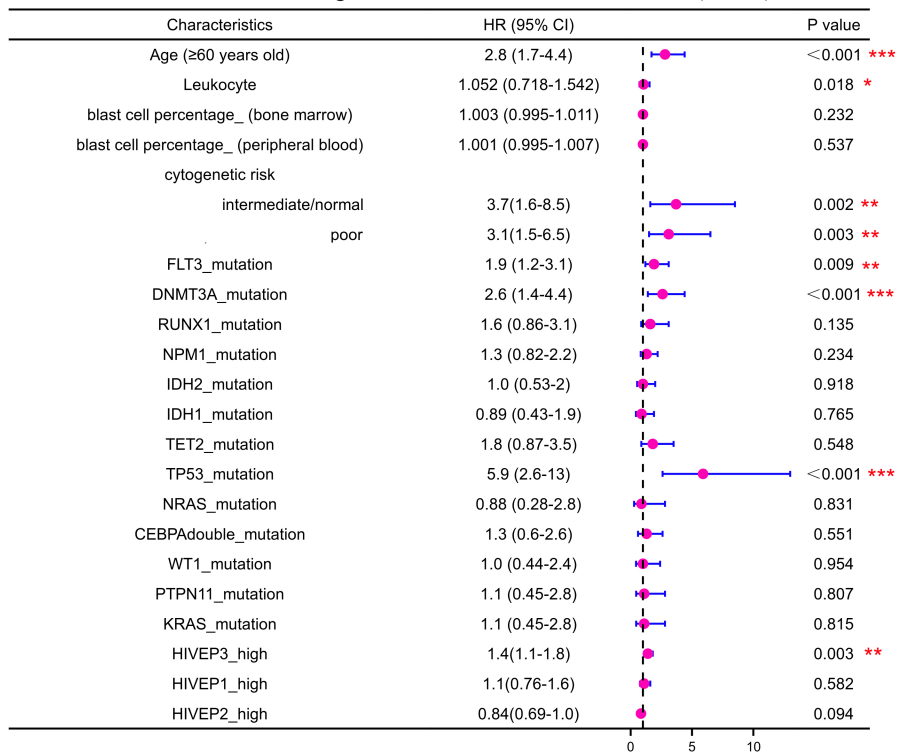

Figure S1.

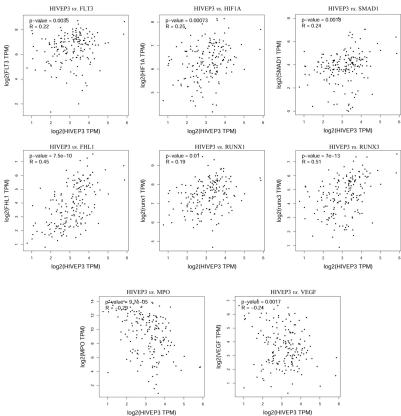

Figure S3.

A.

HIVEP3 vs. LSCs-related genes

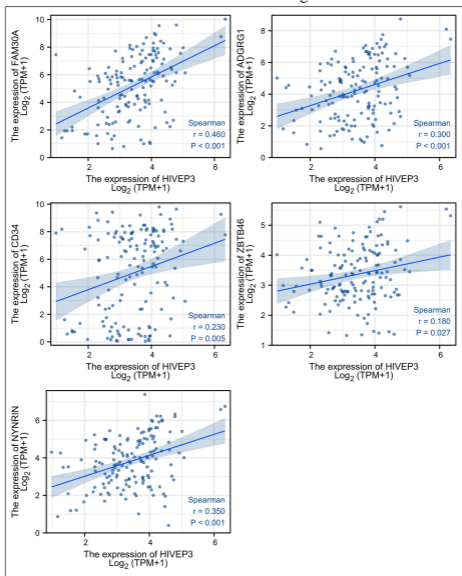

B.

HIVEP3 vs. genes in MAPK signaling pathway

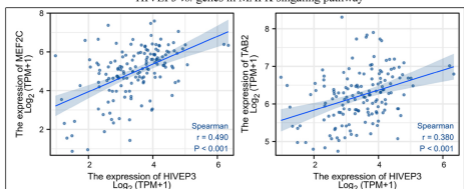

C.

HIVEP3 vs. genes in JAK/STAT signaling pathway

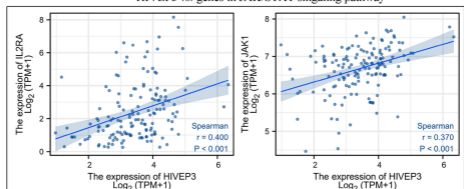

D.

HIVEP3 vs. genes in Wnt signaling pathway

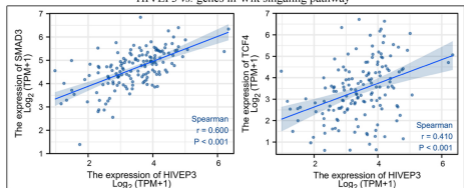

Figure S4.

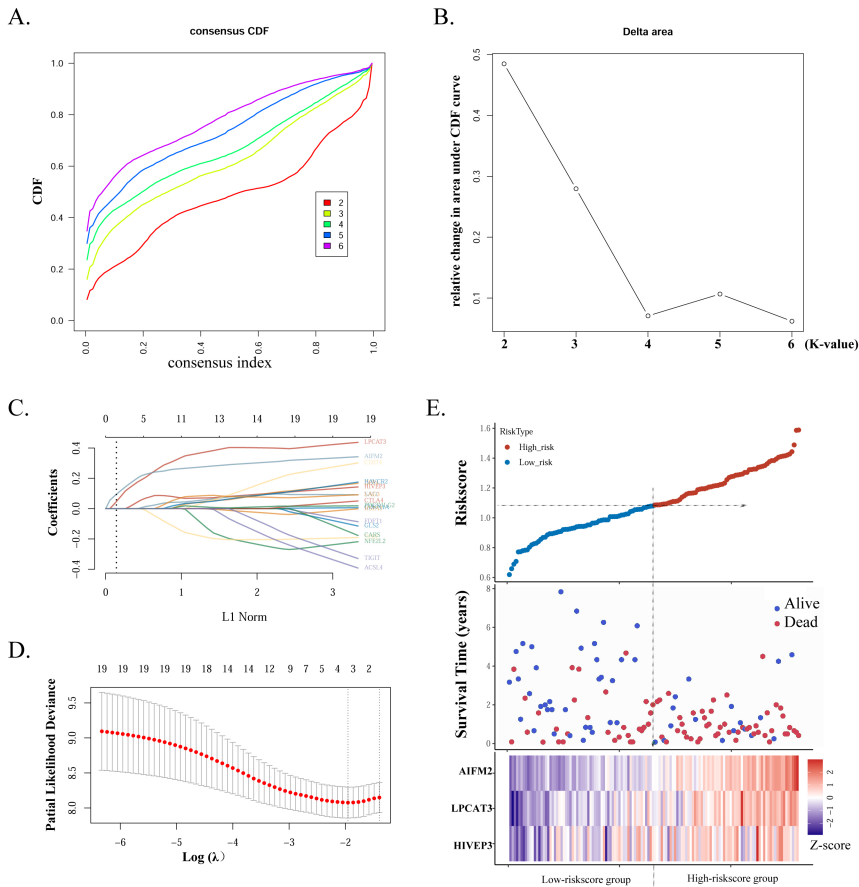

Figure S5.

A.

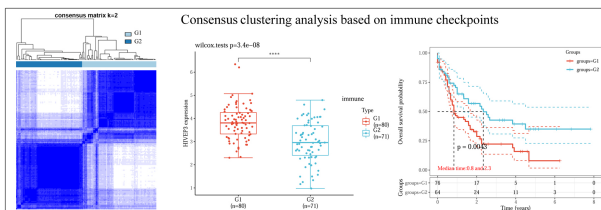

B.

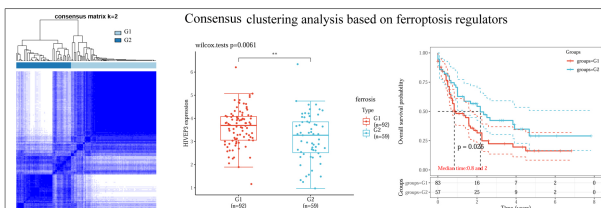

C.

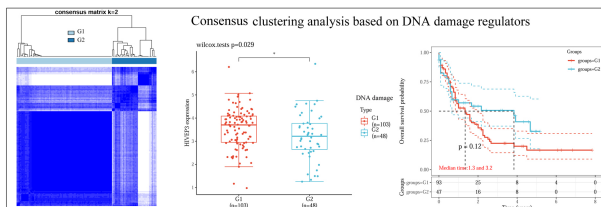

D.

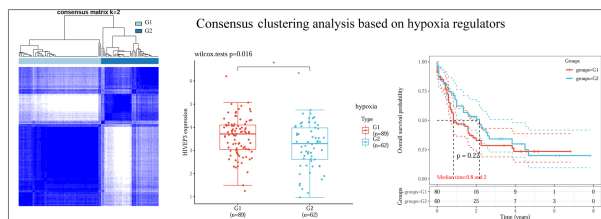

E.

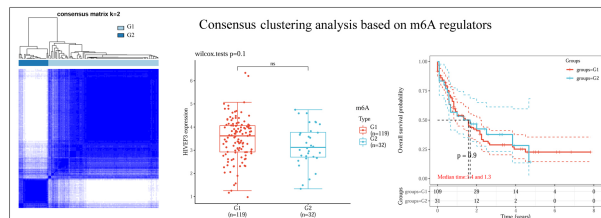

Supplement: CAM4-11-5050-s003.pdf [file CAM4-11-5050-s003.pdf]
